# Supplementary material
Source: Frontiers journal article supplement (https://www.frontiersin.org/articles/526640)
Supplement: Data_Sheet_1.pdf [file Data_Sheet_1.pdf]

## Supporting information

# **Structural and functional characterization of a unique AP endonuclease from *Deinococcus radiodurans***

**Supplementary Table1.** Strains and plasmids used in this study

**Supplementary Table2.** Primes and oligonucleotides used in this study

**Supplementary Table3.** Data collection, phasing and refinement statistics

**Supplementary Figure1.** SDS-PAGE analysis of the purified full-length type and N-terminal truncated DrXth

**Supplementary Figure2.** Sequence alignments among DrXth and other representative ExoIII family AP endonucleases

**Supplementary Figure3.** Kinetic of DrXth nuclease activity

**Supplementary Figure4.** Analysis of ion effects on AP endonuclease activity

**Supplementary Figure5.** Structural comparison among DrXth, NApe, ExoIII and APE1

**Supplementary Figure6.** Deletion of *drxth* gene in D.radiodurans R1 strain

**Supplementary Figure7.** Predicted structure of Gly198 mutant DrXth

**Supplementary Figure8.** Phenotypes of R1 strain and mutant strain under H<sub>2</sub>O<sub>2</sub> stress

**Supplementary Figure9.** Interaction assay between DrXth and DrPolX

**Supplementary Table1. Strains and plasmids used in this study**

| Strain and plasmid             | Description                                                                                                                                                                                                                               | Reference and source |
|--------------------------------|-------------------------------------------------------------------------------------------------------------------------------------------------------------------------------------------------------------------------------------------|----------------------|
| <b>strains</b>                 |                                                                                                                                                                                                                                           |                      |
| <i>Deinococcus radiodurans</i> |                                                                                                                                                                                                                                           |                      |
| R1                             | ATCC 13939                                                                                                                                                                                                                                | Laboratory Stock     |
| $\Delta xth$                   | R1 but <i>xth::kan</i>                                                                                                                                                                                                                    | This study           |
| $\Delta xth/pk-xth$            | $\Delta xth$ but pRADK:: <i>xth</i>                                                                                                                                                                                                       | This study           |
| <i>Escherichia coli</i>        |                                                                                                                                                                                                                                           |                      |
| DH5 $\alpha$                   | <i>E. coli</i> cloning strain                                                                                                                                                                                                             | TransGen             |
| BL21(DE3)                      | <i>E. coli</i> expression strain                                                                                                                                                                                                          | TransGen             |
| <b>plasmids</b>                |                                                                                                                                                                                                                                           |                      |
| pET28a                         | T7 promoter, T7 transcription start, His•Tag coding sequence, T7•Tag coding sequence, Multiple cloning sites(BamH I -Xho I), T7 terminator, <i>lacI</i> coding sequence, pBR322 origin, <i>Kanr</i> , fl origin, 6His-tag coding sequence | Novagen              |
| pET28S                         | pET28 plasmid modified with a Strep-tag sequence (WSHPQFEK)                                                                                                                                                                               | Laboratory Stock     |
| pET28aXth                      | pET28a containing wild type <i>xth</i> gene                                                                                                                                                                                               | This study           |
| pET28aXth $\Delta$ 22          | pET28a containing wild type N-terminus domain of <i>xth</i> gene                                                                                                                                                                          | This study           |
| pET28S-Xth                     | pET28S containing wild type <i>xth</i> gene                                                                                                                                                                                               |                      |
| pET28aD177N                    | pET28a containing <i>xth</i> directed site D155N mutation gene                                                                                                                                                                            | This study           |
| pET28a S143A/N234A/R235A       | pET28a containing <i>xth</i> directed site S121A/N212A/R213A triple mutation gene                                                                                                                                                         | This study           |
| pET28aG198H                    | pET28a containing <i>xth</i> directed site G176H mutation gene                                                                                                                                                                            | This study           |
| pET28aG198A                    | pET28a containing <i>xth</i> directed site G176A mutation gene                                                                                                                                                                            | This study           |
| pET28aAPE                      | pET28a containing <i>ape</i> gene                                                                                                                                                                                                         | This study           |
| pET28aPolA-C                   | pET28a containing C-terminus domain of <i>drpolA</i> gene                                                                                                                                                                                 | This study           |
| pET28aPolX                     | pET28a containing <i>polx</i> gene                                                                                                                                                                                                        | Laboratory Stock     |
| PRADK                          | <i>D. radiodurans</i> shuttle vector                                                                                                                                                                                                      | Laboratory Stock     |
| pk-xth                         | pRADK:: <i>xth</i>                                                                                                                                                                                                                        | This study           |

**Supplementary Table2.** Primes and oligonucleotides used in this study

| Prime                                       | Sequence(5'-3')                                                 |        |
|---------------------------------------------|-----------------------------------------------------------------|--------|
| construction and complement of drxth mutant |                                                                 |        |
| xth p1                                      | CCCCCGAACTCGACGTG                                               |        |
| xth p2(HindIII)                             | CCCAAGCTTCGGCGCCGACCATAGC                                       |        |
| xth p3(BamHI)                               | CGGGATCCACCCTACCTTCTCCCCAGTACC                                  |        |
| xth p4                                      | TCTGCGCTGTCCTCGGTG                                              |        |
| xth p5                                      | TGCTTCTGCAAGAAGTCCGC                                            |        |
| xth p6                                      | GATTCCAGCTCCACCCACCC                                            |        |
| Expression of proteins                      |                                                                 |        |
| Xth F (NdeI)                                | GGAATTCCATATGTTGAGCCTCCTTGCCCCA                                 |        |
| Xth R (BamHI)                               | CGGGATCCTCATTAGATTCCAGCTCCACC                                   |        |
| XthΔ22 (NdeI)                               | GGAATTCCATATGATGTCTGCCCCCGCCG                                   |        |
| XthΔ22 (BamHI)                              | CGGGATCCTCATTAGATTCCAGCTCCACC                                   |        |
| APE1F(NdeI)                                 | GGAATTCCATATGATGCCGAAGCGTGGGAAA                                 |        |
| APE1R(BamHI)                                | CGGGATCCTCACAGTGCTAGGTATAGGGTGATAGG                             |        |
| PolA-C(NdeI)                                | GGAATTCCATATGATGGGGCTGAACGGGGCCA                                |        |
| PolA-C (BamHI)                              | CGGGATCCTCACTTCGTGTCAAACCAGTTTCG                                |        |
| Site-directed mutagenesis                   |                                                                 |        |
| xth G198H(F)                                | GCTCGTGGGGCAGGAAATGGCTGTTTTTCTGGTTGC                            |        |
| xth G198H(R)                                | GCAACCAGAAAAACAGCCATTTCTGCCCCACGAGC                             |        |
| Xth D177N(F)                                | GGCGATGTTGTAGTTGCCGCCGATGACGA                                   |        |
| Xth D177N(R)                                | TCGTCATCGGCGGCAACTACAACATCGCC                                   |        |
| XTH G198A(F)                                | CGTGGGGCAGGAAAGCGCTGTTTTTCTGG                                   |        |
| XTH G198A(R)                                | CCAGAAAAACAGCGCTTTCTGCCCCACG                                    |        |
| Xth S143A(F)                                | CGCCTCGCCGGCGCTGCCGCTCG                                         |        |
| Xth S143A(R)                                | CGAGCGGCAGCGCCGGCGAGGCG                                         |        |
| Xth<br>N234R235A(F)                         | GGCGTAGGCATTGGCGGCGGCGCTCCACCAGGTGTAC                           |        |
| Xth<br>N234R235A(R)                         | GTACACCTGGTGGAGCGCCGCCCAATGCCTACGCC                             |        |
| Oligonucleotides for enzyme activity assay  |                                                                 |        |
| Type of substrate                           | Sequence                                                        | label  |
| THF.T                                       | 5'*GCTATGGACTAAFAATGACTGCGTG 3'                                 | F(THF) |
|                                             | 3'CGATCCTGATTTTTACTGACGCAC5'                                    | *(FAM) |
| Exo40.T                                     | 5'*ATGACAACATAAGCAACACC3' 5'GATAGAACGACCGCCAGTG3'               | *(FAM) |
|                                             | 3'TACTGTTGATTTCTGTTGTGGTCTATCTTGCTGGCGGTCAC5'                   |        |
| Exo40 <sup>P</sup> .T                       | 5'*ATGACAACATAAGCAACACC <sup>P</sup> 3' 5'GATAGAACGACCGCCAGTG3' | *(FAM) |
|                                             | 3'TACTGTTGATTTCTGTTGTGGTCTATCTTGCTGGCGGTCAC5'                   |        |
| Exo40 <sup>THF</sup> .T                     | 5'*ATGACAACATAAGCAACACCF 5'GATAGAACGACCGCCAGTG3'                | F(THF) |
|                                             | 3'TACTGTTGATTTCTGTTGTGGTCTATCTTGCTGGCGGTCAC5'                   | *(FAM) |
| αdA                                         | 5'*TGACTGCATAXGCATGTAGACGATGTGCAT3'                             | X(αdA) |
|                                             | 3'ACTGACGTATACGTACATCTGCTACACGT5'                               | *(FAM) |

**Supplementary Table3.** Data collection, phasing and refinement statistics

|                                                     | DrXth        |
|-----------------------------------------------------|--------------|
| <b>Data collection</b>                              |              |
| Space group                                         | $P2_12_12_1$ |
| Cell dimensions                                     |              |
| <i>a</i> , <i>b</i> , <i>c</i> (Å)                  | 57.42        |
|                                                     | 58.86        |
|                                                     | 74.28        |
| Wavelength (Å)                                      | 0.9792       |
| Resolution (Å)                                      | 30.0-1.50    |
| <i>R</i> <sub>sym</sub> (%)                         | 6.6 (47.3)   |
| <i>I</i> / <i>σI</i>                                | 14.6 (4.3)   |
| Completeness (%)                                    | 98.2         |
|                                                     | (91.0)       |
| Redundancy                                          | 5.1 (3.4)    |
| <b>Refinement</b>                                   |              |
| Resolution (Å)                                      | 30.0-1.50    |
| No. reflections                                     | 40705        |
| <i>R</i> <sub>work</sub> / <i>R</i> <sub>free</sub> | 18.6/20.4    |
| No. atoms                                           |              |
| Protein                                             | 1941         |
| Water                                               | 243          |
| B-factors                                           |              |
| Protein                                             | 19.3         |
| Water                                               | 32.0         |
| R.m.s deviations                                    |              |
| Bond lengths (Å)                                    | 0.005        |
| Bond angles (°)                                     | 0.865        |

\*Highest resolution shell is shown in parenthesis.

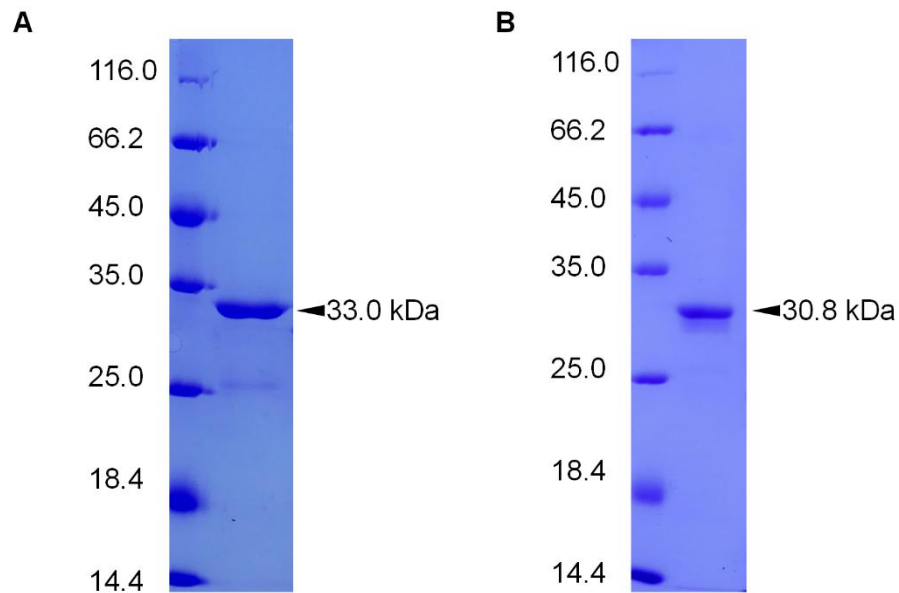

**Supplementary Figure1.** SDS-PAGE analysis of the purified full-length type and N-terminal truncated DrXth. (A) Molecular weight of full-length type DrXth protein with His-tag is 33.0 kDa. (B) Molecular weight of N-terminal truncated DrXth protein (N $\Delta$ 22DrXth) with His-tag is 30.8 kDa.

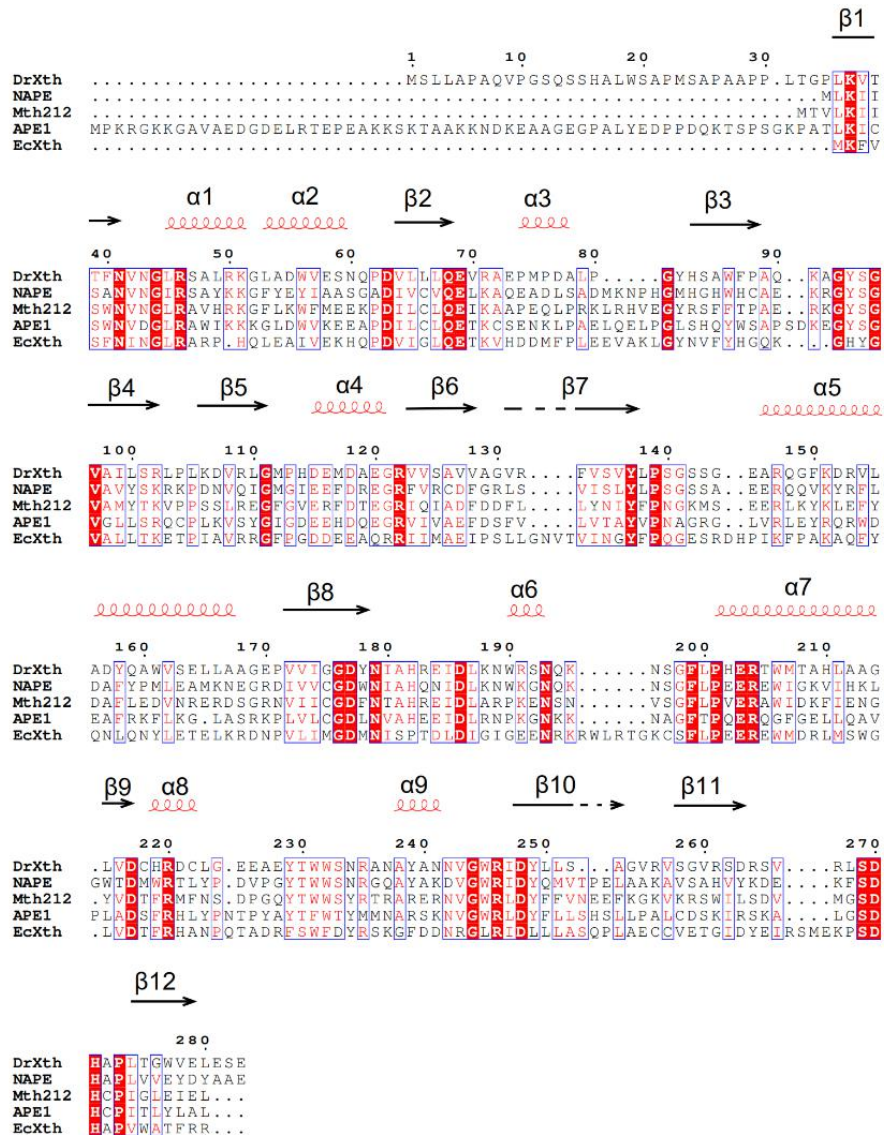

**Supplementary Figure2.** Sequence alignments among DrXth and other representative ExoIII family AP endonucleases. DrXth, *Deinococcus radiodurans*; NApe, *Neisseria meningitidis*; Mth212, *Methanobacterium thermoautotrophicum*; APE1, *Homo sapiens*; EcXth, *Escherichia coli*.

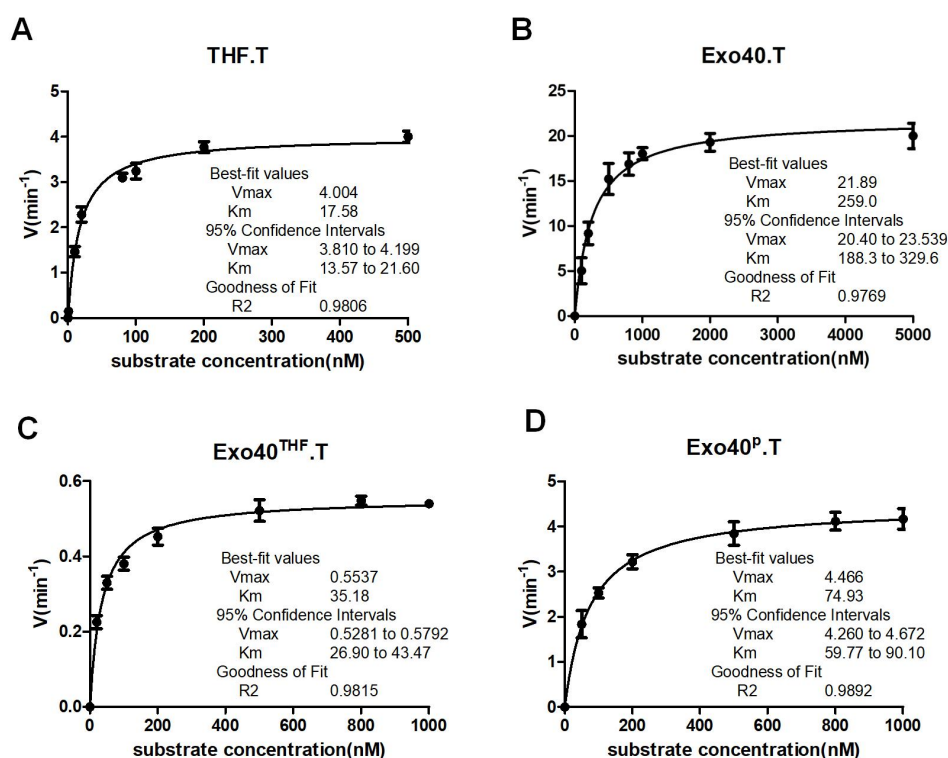

**Supplementary Figure3.** Kinetic of DrXth nuclease activity. (A) DrXth (1 nM) was incubated with increasing amounts of THF.T substrate (1, 10, 50, 80, 100, 200, 500 nM) at 37°C for 3 min. (B) DrXth (3 nM) was incubated with increasing amounts of Exo40.T substrate (200, 500, 800, 1000, 2000, 5000 nM) at 37°C for 3 min. (C) DrXth (3 nM) was incubated with increasing amounts of Exo40THF.T substrate (20, 50, 100, 200, 500, 800, 1000 nM) at 37°C for 3 min. (D) DrXth (3 nM) was incubated with increasing amounts of Exo40P.T substrate (20, 50, 100, 200, 500, 800, 1000 nM) at 37°C for 3 min. The data were fitted by the Michaelis–Menten equation in GraphPad Prism 5 in order to obtain the K<sub>cat</sub> and K<sub>m</sub>. Best-fit values, 95% confidence intervals and goodness of fit are shown.

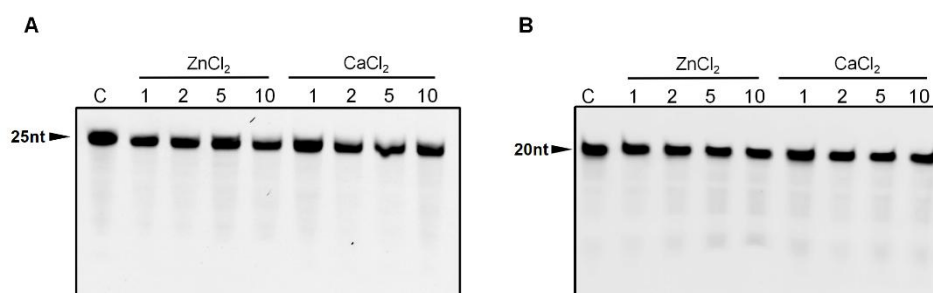

**Supplementary Figure4.** Analysis of ion effects on AP endonuclease activity. (A) 100 nM THF.T duplex was incubated with 2 nM DrXth in the presence of CaCl<sub>2</sub> or ZnCl<sub>2</sub> (1, 2, 5 or 10 mM) at 37°C for 5 min. (B) 100 nM Exo40.T 1nt gap duplex was incubated

with 10 nM DrXth in the presence of  $\text{CaCl}_2$  or  $\text{ZnCl}_2$  (1, 2, 5 or 10 mM) at 37°C for 5 min.

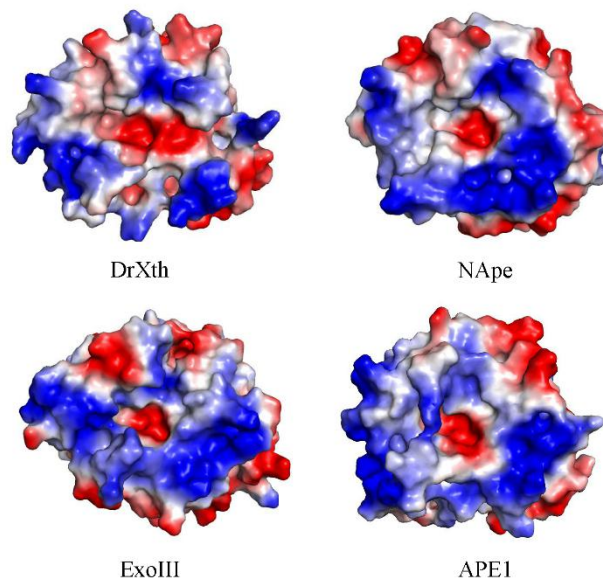

**Supplementary Figure5.** Structural comparison among DrXth, NApe, ExoIII and APE1. The structure shows the distribution of the electrostatic surface. Blue and red represent negative and positive charge potential at + and  $-70 \text{ kTe}^{-1}$  scale, respectively.

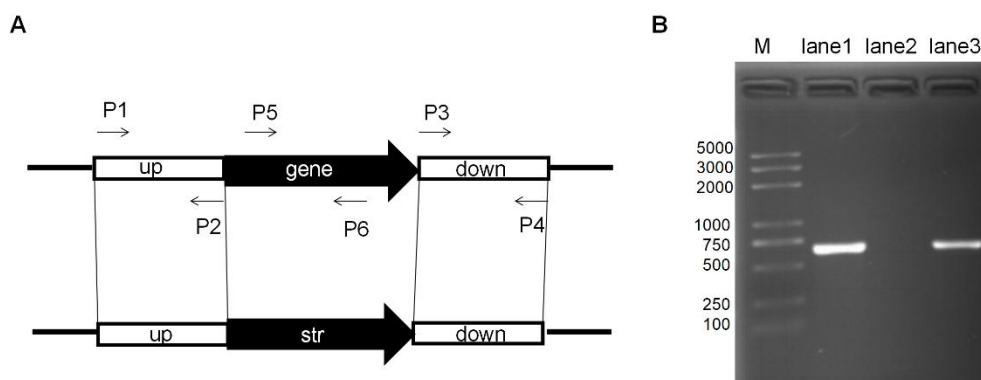

**Supplementary Figure6.** Deletion of *drxth* gene in *D.radiodurans* R1 strain (A) Scheme of gene mutation by homologous recombination that replaced the target ORFs with streptomycin-resistant fragment. P1, P2, P3, P4, P5 and P6 refer to the primer pairs (Supporting information Table2). (B) PCR analysis to confirm the mutation of *drxth*. An interior DNA fragment (652 bp) of the targeted gene was detected by amplification using primers P5 and P6. No products corresponding to the size of the fragment was observed from mutant (lane 2) but observed in the wild type (lane 1) and compensation type (lane 3), suggesting that the wild type alleles were completely replaced by streptomycin-resistance fragment in the mutant.



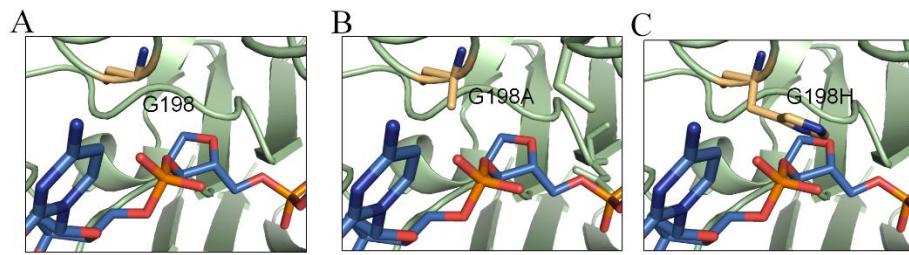

**Supplementary Figure7.** Predicted structure of Gly198 mutant DrXth. DNA from NApe-DNA complex were docked onto the DrXth by superposition between DrXth and NApe. (A) DrXth (B) Substitutue Ala for Gly198 (C) Substitute His for Gly198.

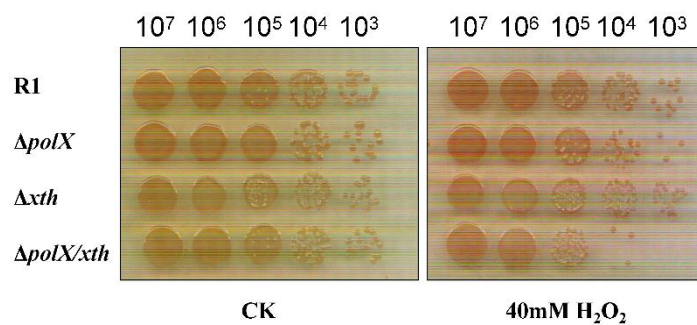

**Supplementary Figure8.** Phenotypes of R1 strain and mutant strain under H<sub>2</sub>O<sub>2</sub> stress. Growth and H<sub>2</sub>O<sub>2</sub> resistance features of wild type (R1), *drpolX* disruptant ( $\Delta polX$ ), *drxth* disruptant ( $\Delta xth$ ), *drpolX-drxth* double disruptant ( $\Delta polX/ xth$ ). Cells were incubated with H<sub>2</sub>O<sub>2</sub> (40 mM) for 30min and then the reaction were stopped by excess catalyase for 15 min. After treatment, the cells were serially diluted 1:10 and spotted on TGY agar plates, and then cultivated at 30°C for 3 days.

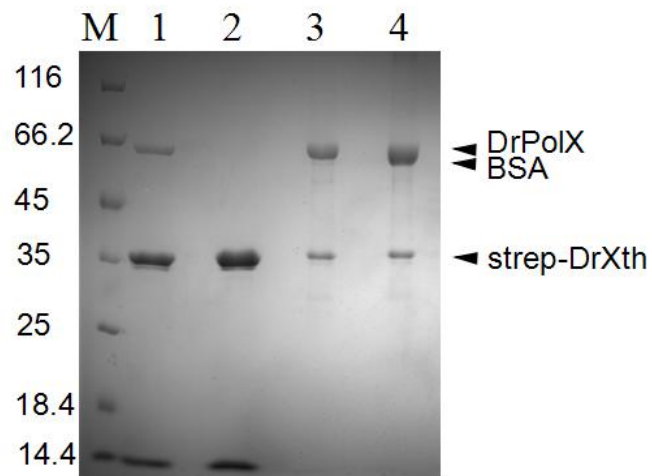

**Supplementary Figure9.** Interaction assay between His-Strep- DrXth and DrPolX. His-Strep-DrXth (N-terminal fused streptavidin tag) binding with strep-beads were rotating incubated with DrPolX and BSA at 4 °C for 3h. Lane1: His-Strep-DrXth and DrPolX were pulled-down by strep-beads. Lane2: His-Strep-DrXth and BSA (input control) were pulled by strep-beads. Lane3: His-Strep-DrXth and DrPolX. Lane4: His-Strep-DrXth and BSA (input control).
